# Supplementary material for: DNA methylation mediated genetic risk in severe acne in a young men population
Source: Front Med (Lausanne). 2023 Jul 24;10:1196149. doi: 10.3389/fmed.2023.1196149 (PMC10405078; doi:10.3389/fmed.2023.1196149)
Supplement: Supplementary file 3 [file Table_3.XLSX]

## Sheet: Sheet1
Supplementary Table 3. The results of SNP-CpG pairs that mediate the genetic risk of severe ance
snps	gene	statistic	pvalue	FDR	beta
kgp1991330	cg20652636	7.92672	7.9482e-12	2.4083e-09	0.0847206
rs2292653	cg20652636	6.11502	2.84e-08	4.30259e-06	0.0800485
rs1969260	cg20652636	-4.66443	1.14054e-05	0.00115194	-0.0575293
rs7340340	cg20652636	-4.47866	2.32239e-05	0.0015095	-0.0577074
rs6886	cg20652636	-4.46013	2.49093e-05	0.0015095	-0.0577302
rs11226216	cg03020863	4.22578	5.96061e-05	0.00301011	0.0533045
rs11147102	cg07161061	3.8704	0.00021249	0.00919777	0.115466
rs10781655	cg07161061	3.7601	0.000311021	0.0117799	0.105305
rs11147102	cg18946787	-3.61689	0.000504935	0.0138386	-0.0637908
kgp12359476	cg13102742	3.60701	0.000521869	0.0138386	0.181172
kgp8146808	cg12114963	-3.54234	0.000646791	0.0138386	-0.0622467
kgp5153576	cg12114963	-3.53796	0.000656217	0.0138386	-0.0425525
kgp6774449	cg13102742	3.53647	0.000659442	0.0138386	0.208234
rs3795811	cg12114963	-3.52636	0.000681764	0.0138386	-0.0426757
kgp294209	cg12114963	-3.48553	0.000779417	0.0138386	-0.042547
rs503391	cg12114963	-3.48399	0.000783349	0.0138386	-0.0423758
kgp2923441	cg03020863	-3.47736	0.000800478	0.0138386	-0.0505188
rs12735877	cg12114963	-3.43674	0.000913438	0.0138386	-0.0424866
rs564309	cg12114963	-3.43674	0.000913438	0.0138386	-0.0424866
rs1188473	cg12114963	-3.43674	0.000913438	0.0138386	-0.0424866
rs10781655	cg18946787	-3.36962	0.00113362	0.0163565	-0.0560498
rs12624116	cg19964325	-3.25122	0.00164815	0.0226995	-0.0466089
rs17102225	cg03020863	3.12055	0.00246595	0.0320683	0.0460309
rs4754106	cg03020863	3.1108	0.00254006	0.0320683	0.0404253
